# Supplementary material
Source: publisher figshare collection journal article supplement (https://tandf.figshare.com/ndownloader/files/22514717)
Supplement: Supplementary file 1 [file 22514717]

Supplemental Table 1. Experimental parameters for diffraction patterns.

Energy Beam size Detector-sample detector oscillation exposure data

(keV) (mm) separation (m) pixels (µm) range (°) (sec) collected

1-BM 20.019 0.4 x 0.4 0.500 100 3 variable[[1]](#footnote-1) Nov. 2003

1-ID 80.7 0.05 x 0.05 1.236 150 0 8.0-8.5[[2]](#footnote-2) Aug. 2004

1. 5 s for CeO2, 2.5 s for *E. tribuloides* and *M. globulus*, 1.5 s for *T. niger* and 0.5 s for *L. variegatus*. [↑](#footnote-ref-1)
2. Acquisition for 2 x 106 cts in the incident beam ionization detector. [↑](#footnote-ref-2)
